# Supplementary material for: Changes of Circulating Extracellular Vesicles from the Liver after Roux-en-Y Bariatric Surgery
Source: MDPI journal article supplement (doi:10.3390/ijms20092153), 2019-04-30
Supplement: s1 [file s1]

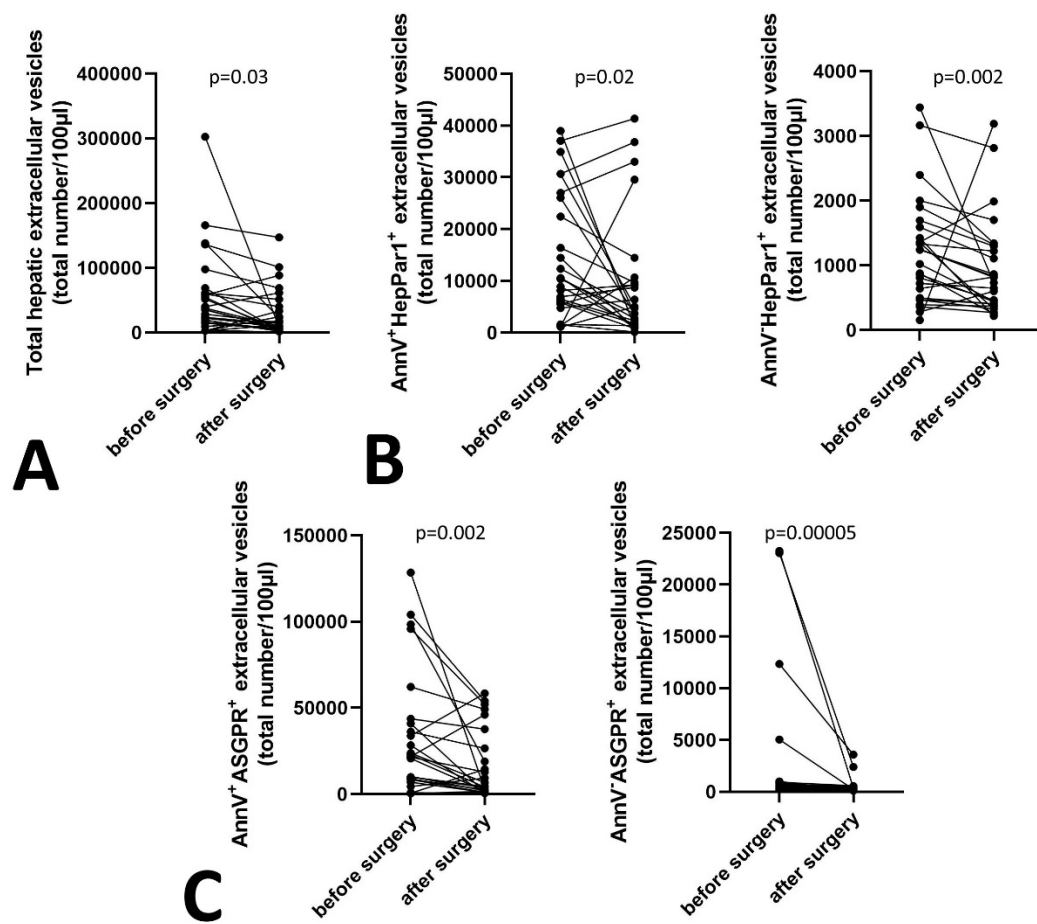

**Supplementary Figure 1:**

Individual data points for all patients are given for total hepatic EVs (A), HepPar1 EVs (B), and ASGPR EVs (C).
